# Supplementary material
Source: PubMed Central journal article supplement (PMC10860652)

# Supplementary Fig. 1

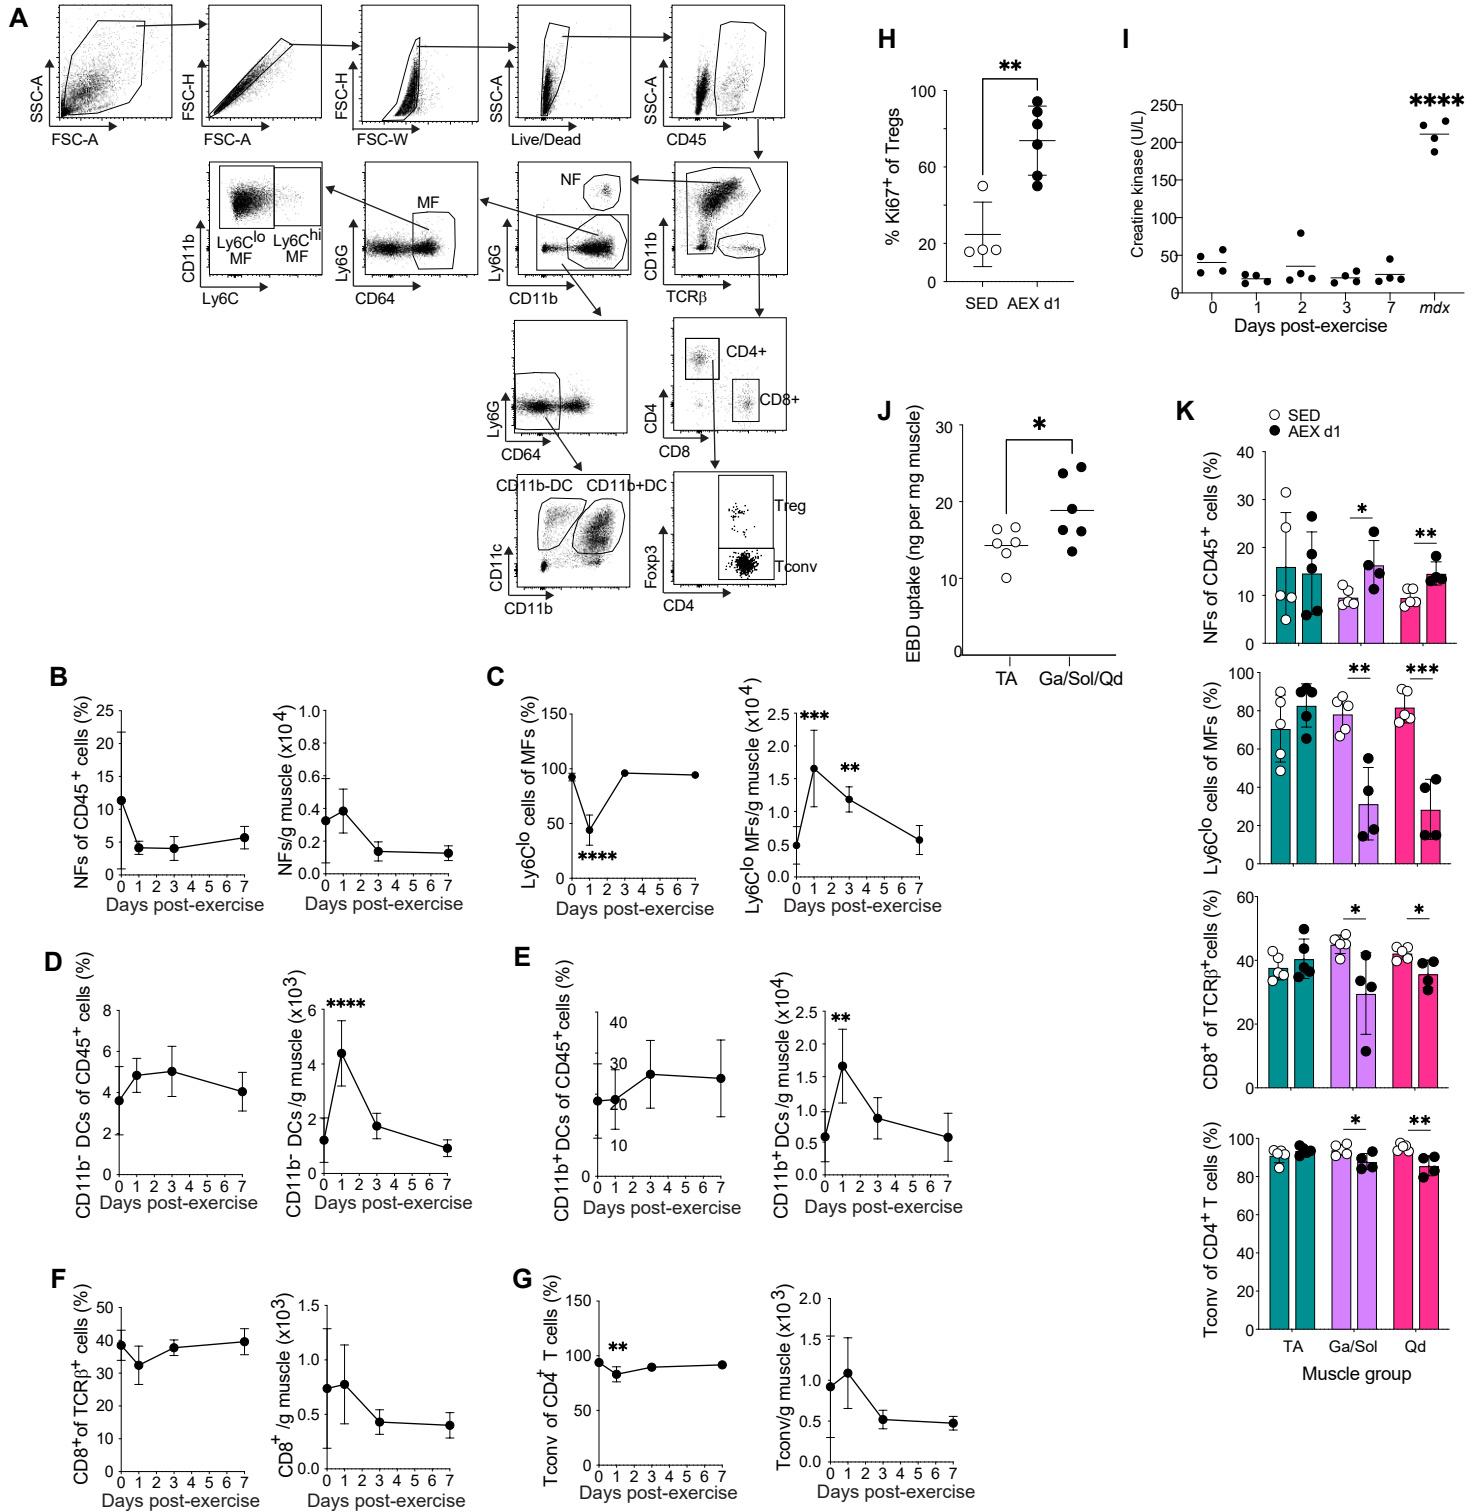

Supplement: NIHMS1957562-supplement-Suppl__Fig__S1.pdf [file NIHMS1957562-supplement-Suppl__Fig__S1.pdf]

# Supplementary Fig.2

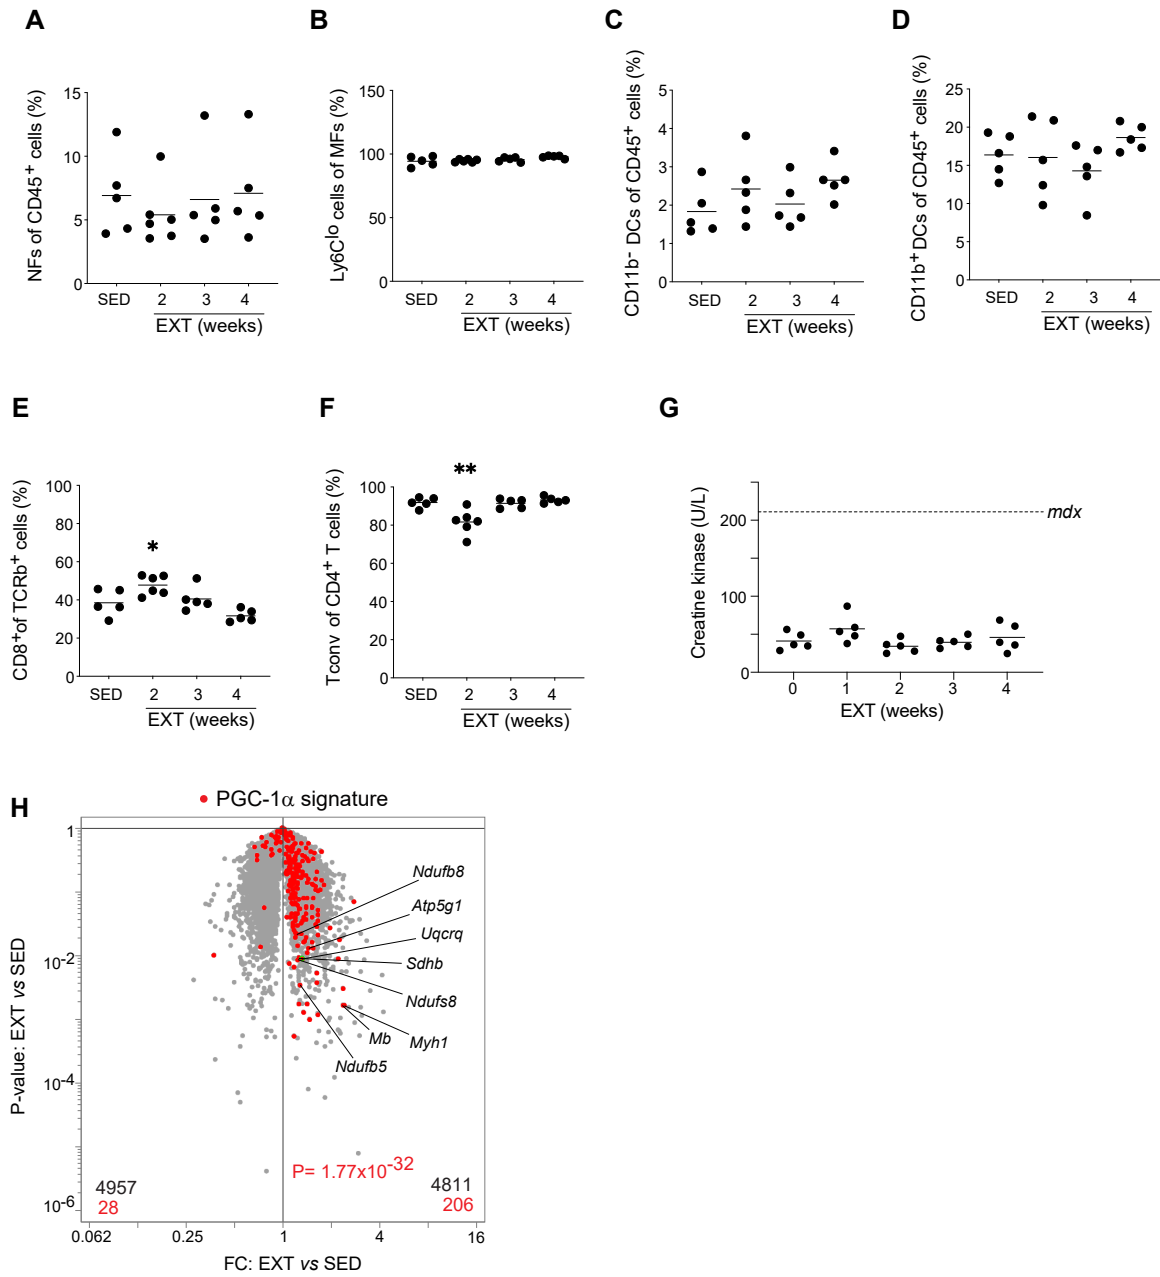

Supplement: NIHMS1957562-supplement-Suppl__Fig__S2.pdf [file NIHMS1957562-supplement-Suppl__Fig__S2.pdf]

# Supplementary Fig.3

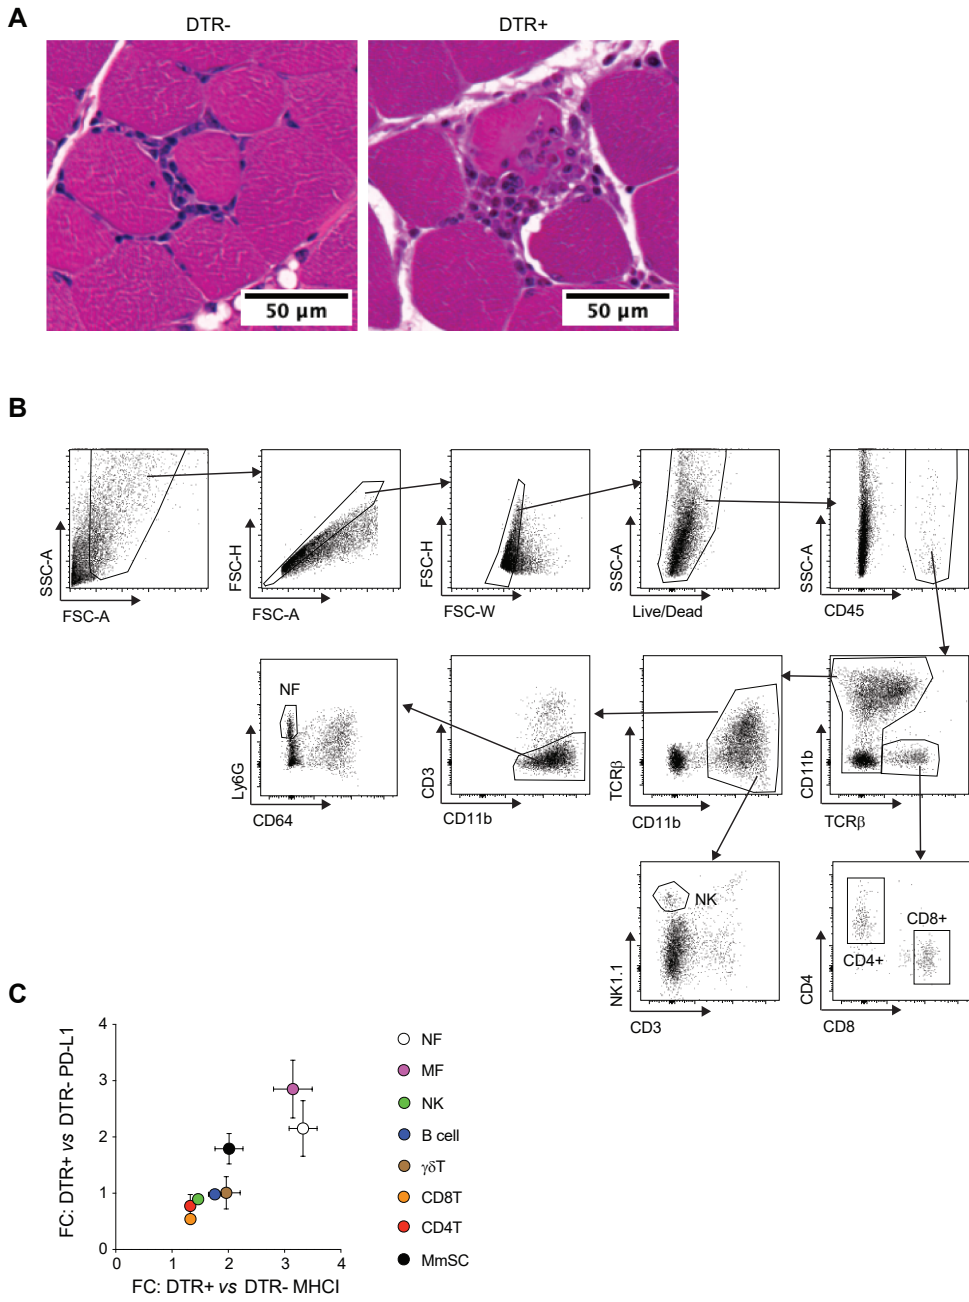

Supplement: NIHMS1957562-supplement-Suppl__Fig__S3.pdf [file NIHMS1957562-supplement-Suppl__Fig__S3.pdf]

# Supplementary Fig.4

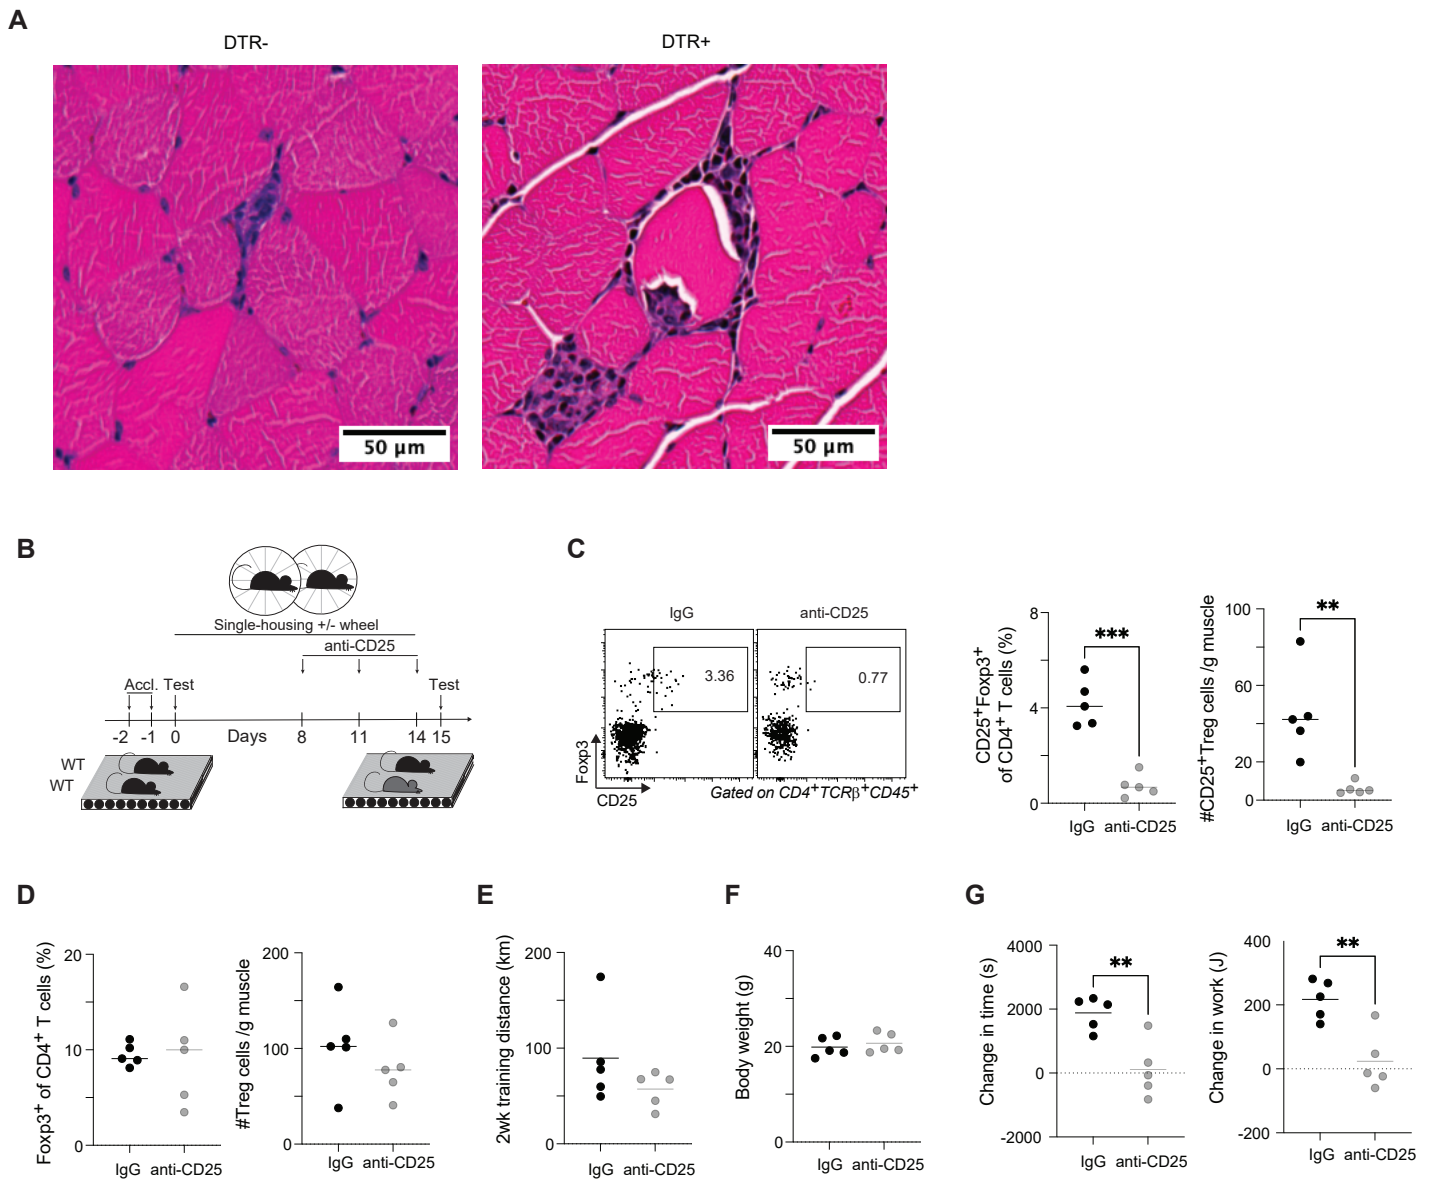

Supplement: NIHMS1957562-supplement-Suppl__Fig__S4.pdf [file NIHMS1957562-supplement-Suppl__Fig__S4.pdf]

# Supplementary Fig.5

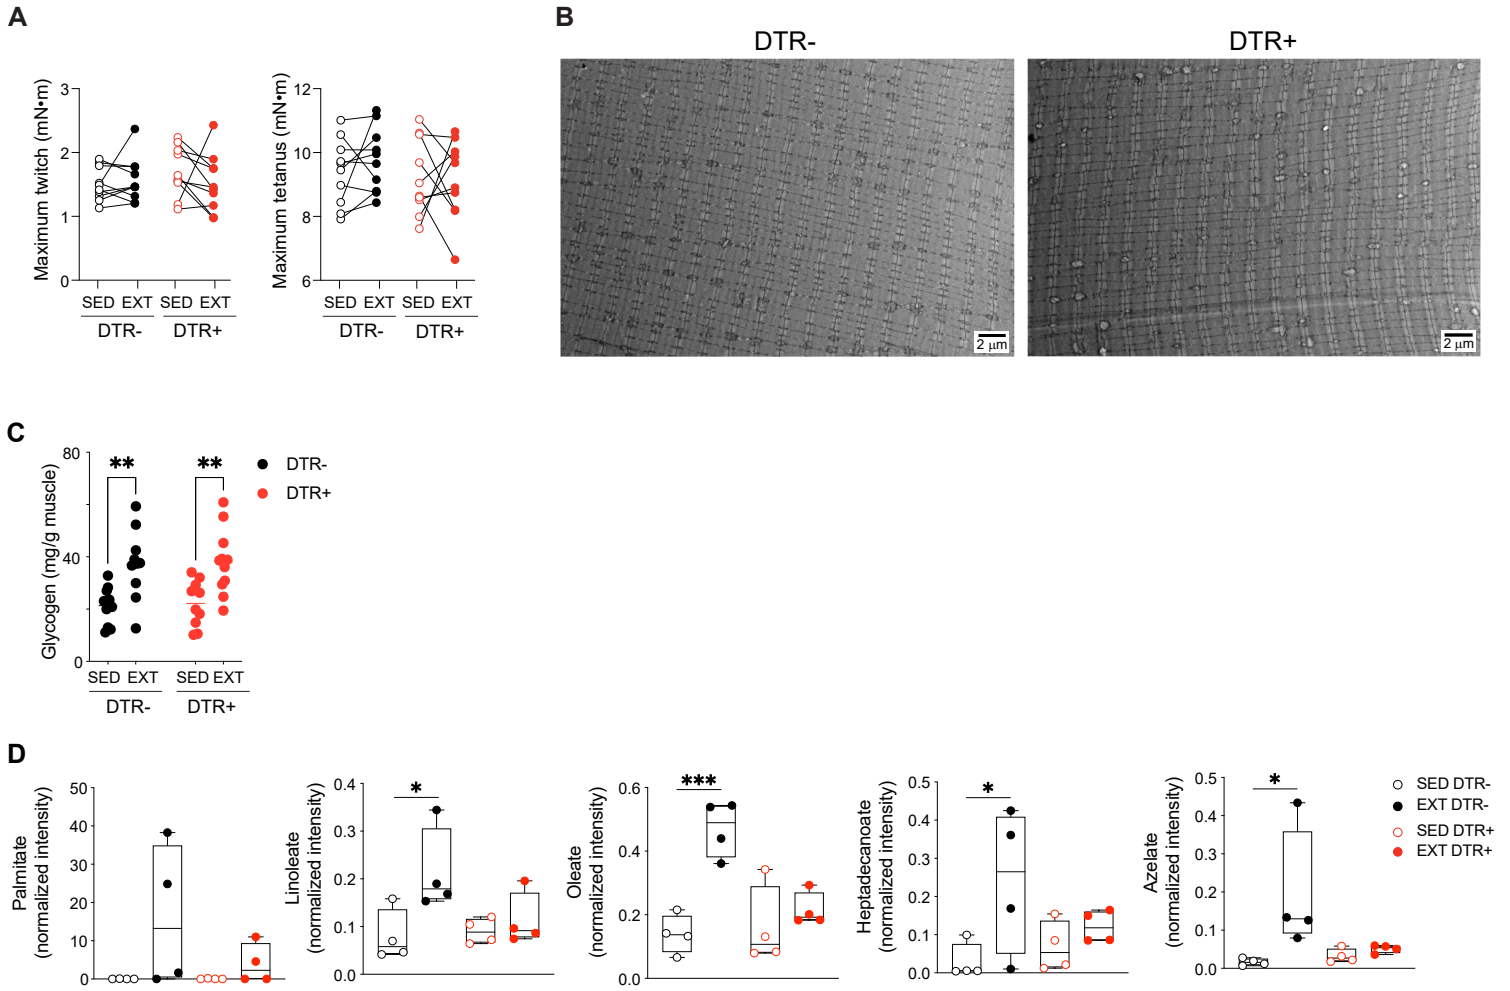

Supplement: NIHMS1957562-supplement-Suppl__Fig__S5.pdf [file NIHMS1957562-supplement-Suppl__Fig__S5.pdf]

Supplementary Fig.6

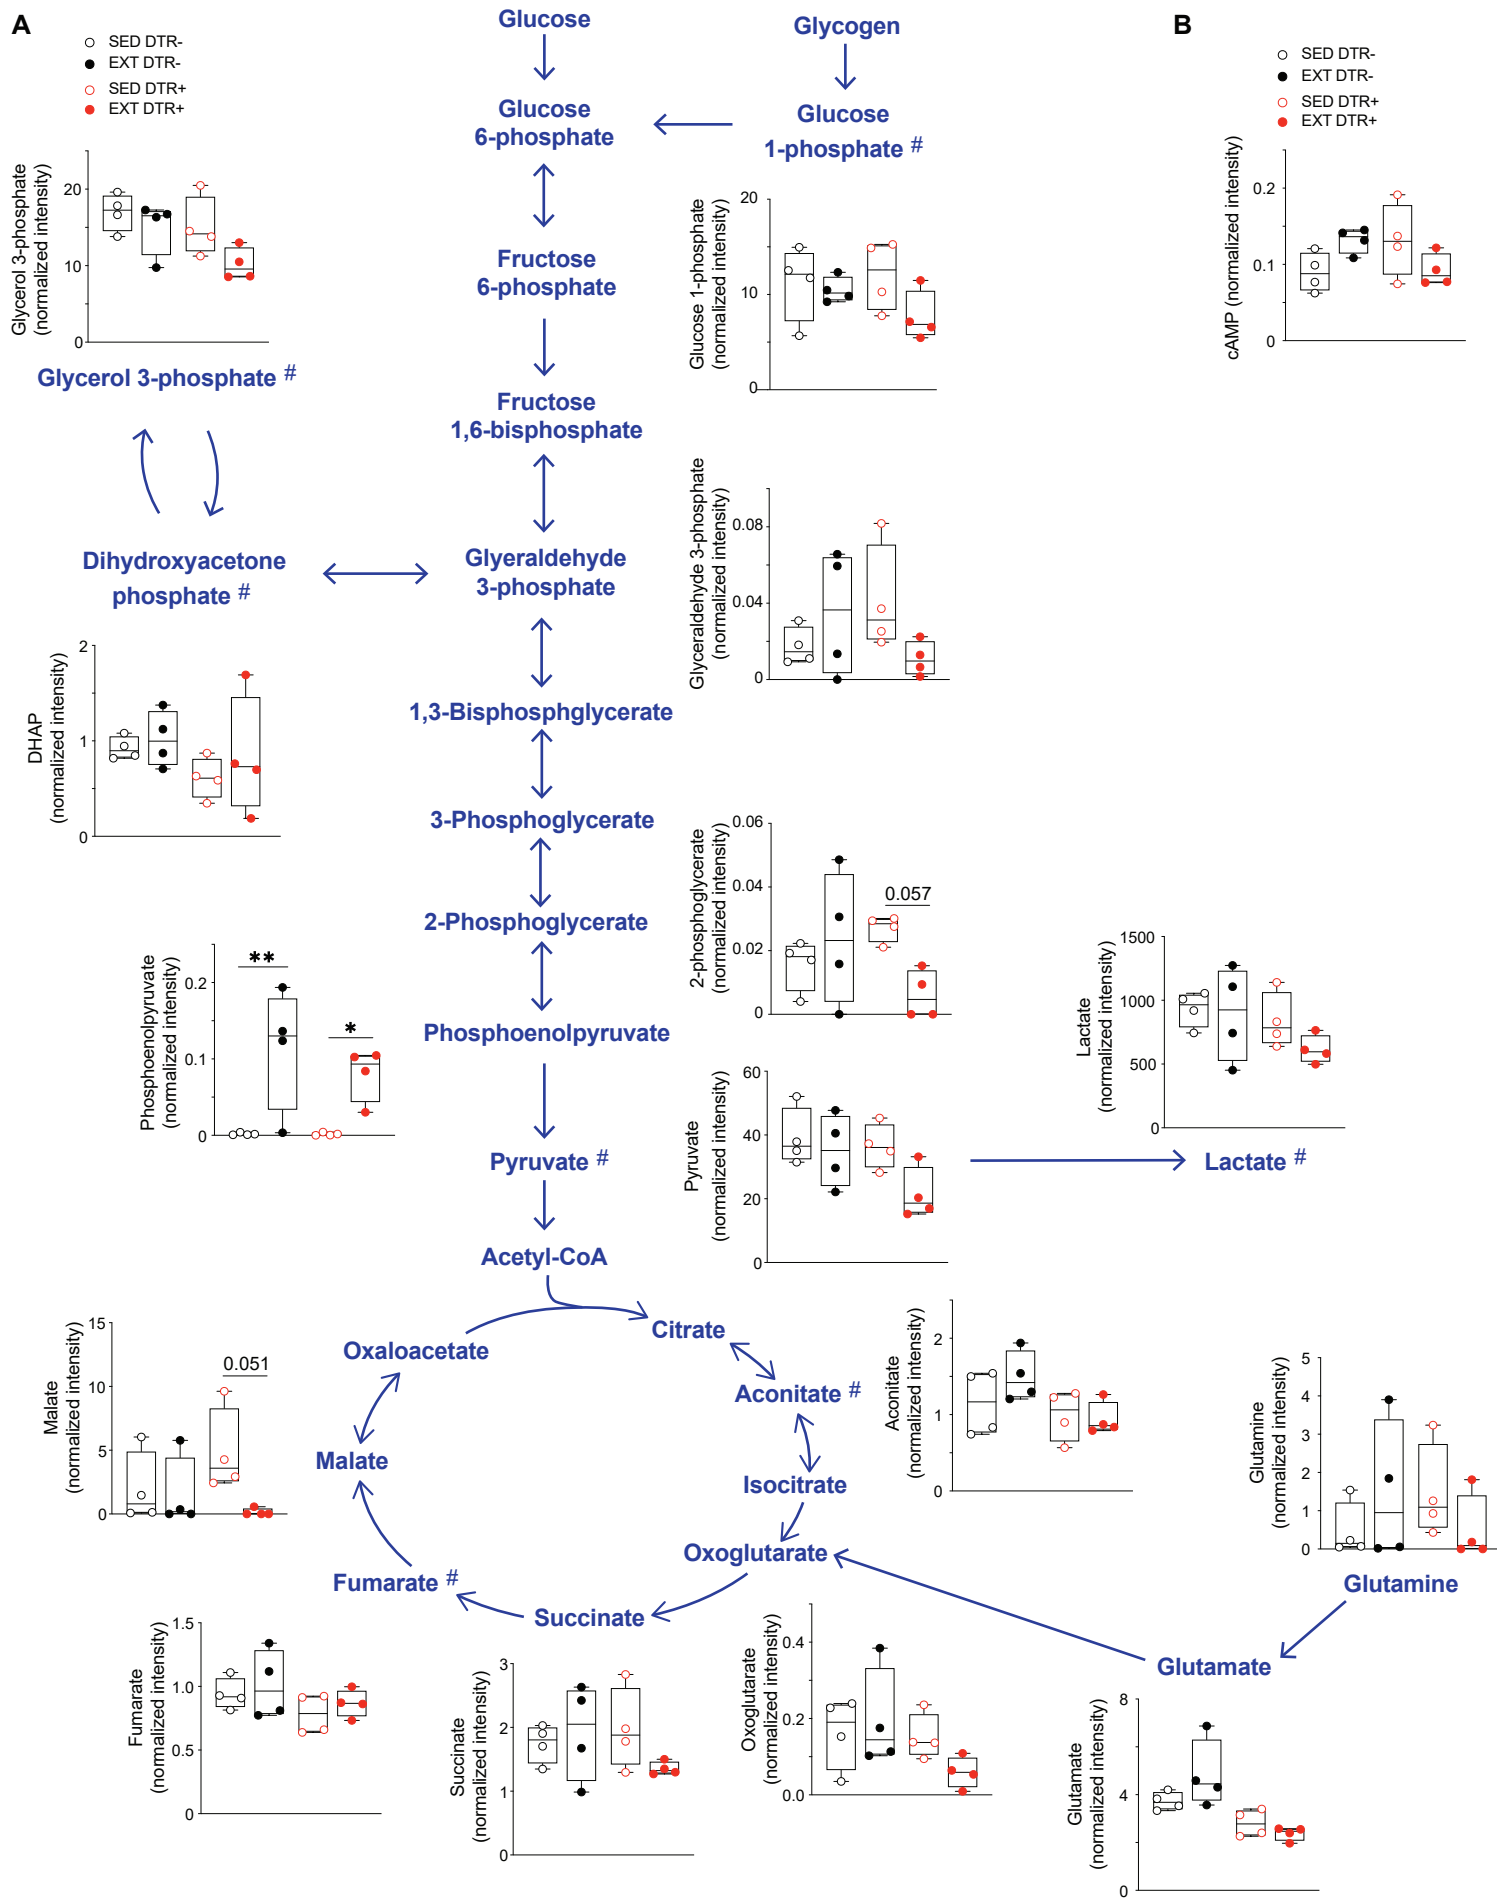

Supplement: NIHMS1957562-supplement-Suppl__Fig__S6.pdf [file NIHMS1957562-supplement-Suppl__Fig__S6.pdf]

Supplementary Fig.7

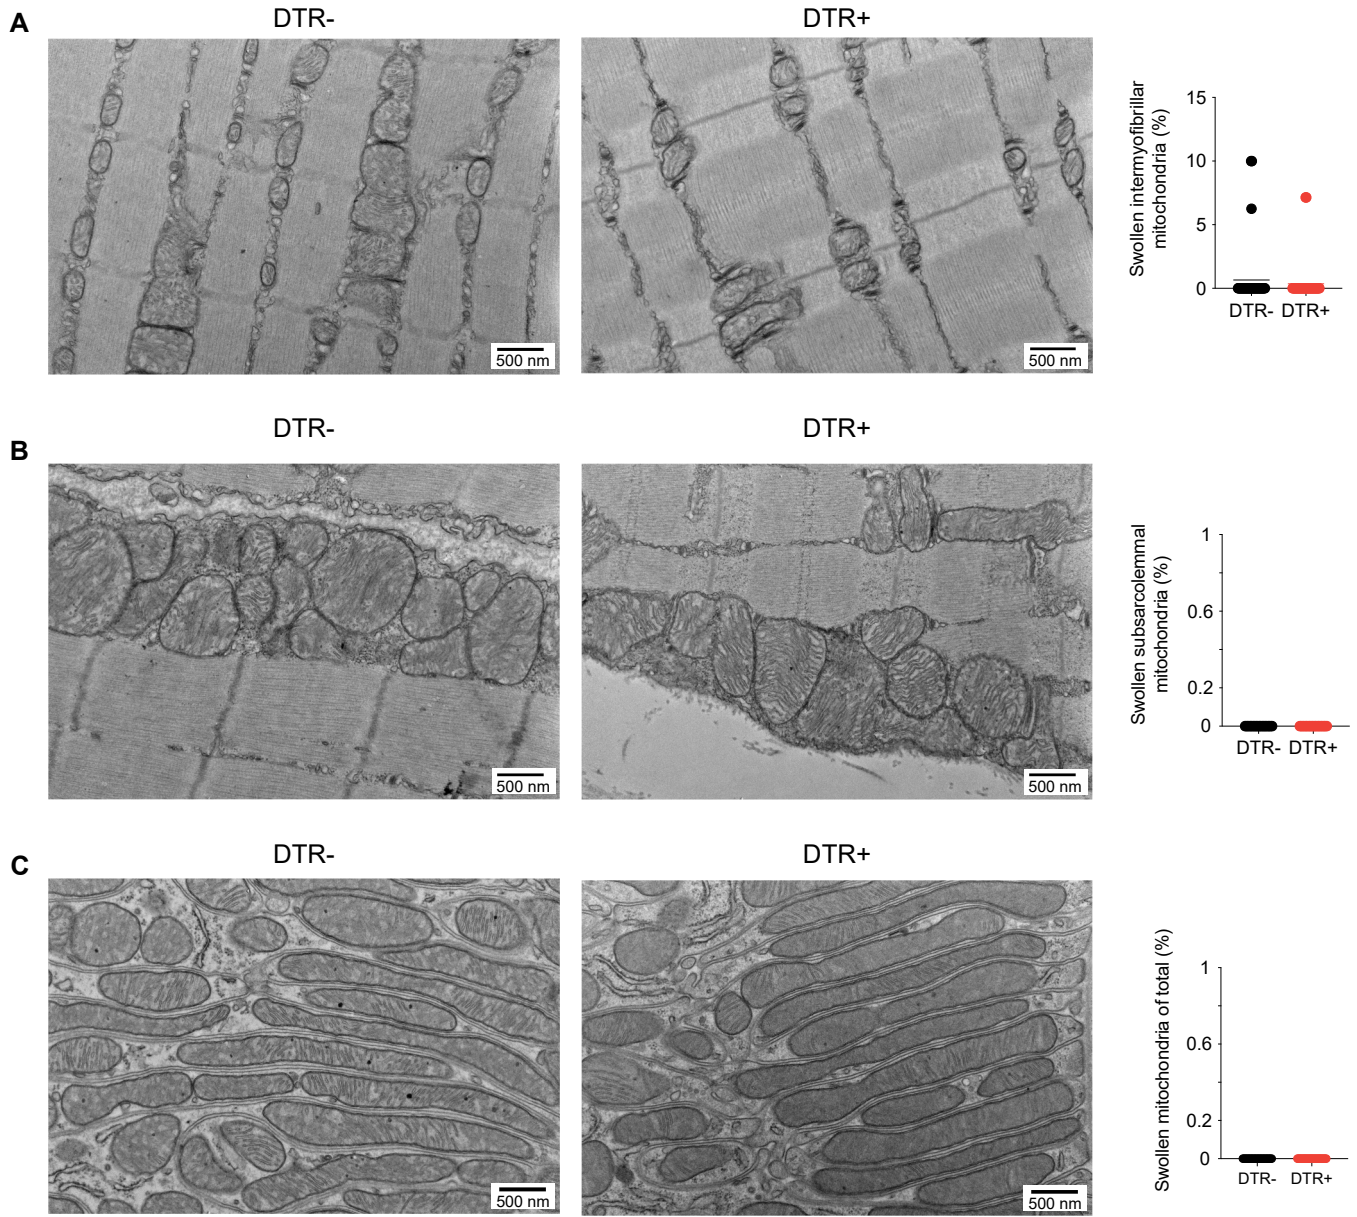

Supplement: NIHMS1957562-supplement-Suppl__Fig__S7.pdf [file NIHMS1957562-supplement-Suppl__Fig__S7.pdf]

Supplementary Fig. 8

A

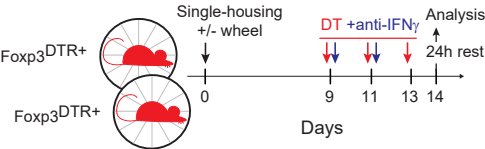

B

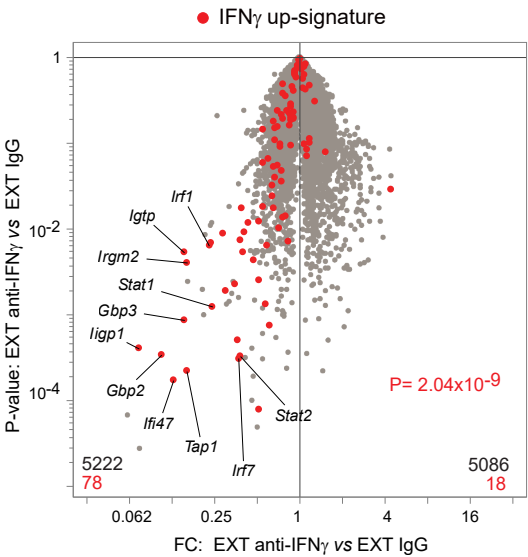

Supplement: NIHMS1957562-supplement-Suppl__Fig__S8.pdf [file NIHMS1957562-supplement-Suppl__Fig__S8.pdf]
